# Supplementary material for: Integrated perovskite solar capacitors with high energy conversion efficiency and fast photo-charging rate
Source: Royal Society of Chemistry journal article supplement (doi:10.1039/c7ta09099d), 2017-11-23
Supplement: c7ta09099d1.pdf [file c7ta09099d1.pdf]

**Supporting Information:**

**Integrated Perovskite Solar Capacitors with  
High Energy Conversion Efficiency and  
Fast Photo-Charging Rate**

*Jia Liang, <sup>a#</sup> Guoyin Zhu, <sup>a#</sup> Zhipeng Lu, <sup>a</sup> Peiyang Zhao, <sup>a</sup> Caixing Wang, <sup>a</sup> Yue Ma, <sup>a</sup>  
Zhaoran Xu, <sup>a</sup> Yanrong Wang, <sup>a</sup> Yi Hu, <sup>a</sup> Lianbo Ma, <sup>a</sup> Tao Chen, <sup>a</sup> Zuoxiu Tie, <sup>a</sup> Jie Liu, <sup>a,b</sup>  
and Zhong Jin<sup>a\*</sup>*

<sup>a</sup>Key Laboratory of Mesoscopic Chemistry of MOE, School of Chemistry and Chemical Engineering, Nanjing University, Nanjing, Jiangsu 210023, China.

<sup>b</sup>Department of Chemistry, Duke University, Durham, NC 27708, USA.

AUTHOR INFORMATION

**Corresponding Author**

\*E-mail: [zhongjin@nju.edu.cn](mailto:zhongjin@nju.edu.cn)

# These two authors contributed equally to this work.

**Table S1.** Performance comparison of integrated photo-powering energy devices in this study and previous literatures.

| Reference | Photovoltaic unit                      | Energy storage unit | Architecture | Voltage plateau (V) | $\eta$ (%) |
|-----------|----------------------------------------|---------------------|--------------|---------------------|------------|
| This work | PSC                                    | Supercapacitor      | Integrated   | 0.91                | 7.1        |
| [1]       | DSSC                                   | Supercapacitor      | Integrated   | 0.70                | 1.8        |
| [2]       | DSSC                                   | Supercapacitor      | Integrated   | 0.65                | 1.8        |
| [3]       | DSSC                                   | Supercapacitor      | Integrated   | 0.63                | 1.2        |
| [38]      | DSSC                                   | Supercapacitor      | Integrated   | 0.60                | 1.6        |
| [39]      | DSSC                                   | Supercapacitor      | Integrated   | 0.62                | 2.1        |
| [40]      | DSSC                                   | Supercapacitor      | Integrated   | 0.64                | 2.1        |
| [41]      | DSSC                                   | Flow battery        | Integrated   | --                  | --         |
| [43]      | PSC                                    | Supercapacitor      | Separated    | 1.45                | 10         |
| [45]      | PSC                                    | Li-ion Battery      | Separated    | --                  | 7.8        |
| [46]      | PSC                                    | Supercapacitor      | Integrated   | 0.70                | 4.7        |
| [47]      | Dual-silicon photoelectrochemical cell | Flow battery        | Integrated   | --                  | 3.2        |
| [48]      | DSSC                                   | Li-oxygen battery   | Integrated   | --                  | --         |
| [49]      | DSSC                                   | Supercapacitor      | Integrated   | 0.60                | 1.5        |
| [50]      | Polymer Solar Cell                     | Supercapacitor      | Integrated   | 0.40                | 0.8        |

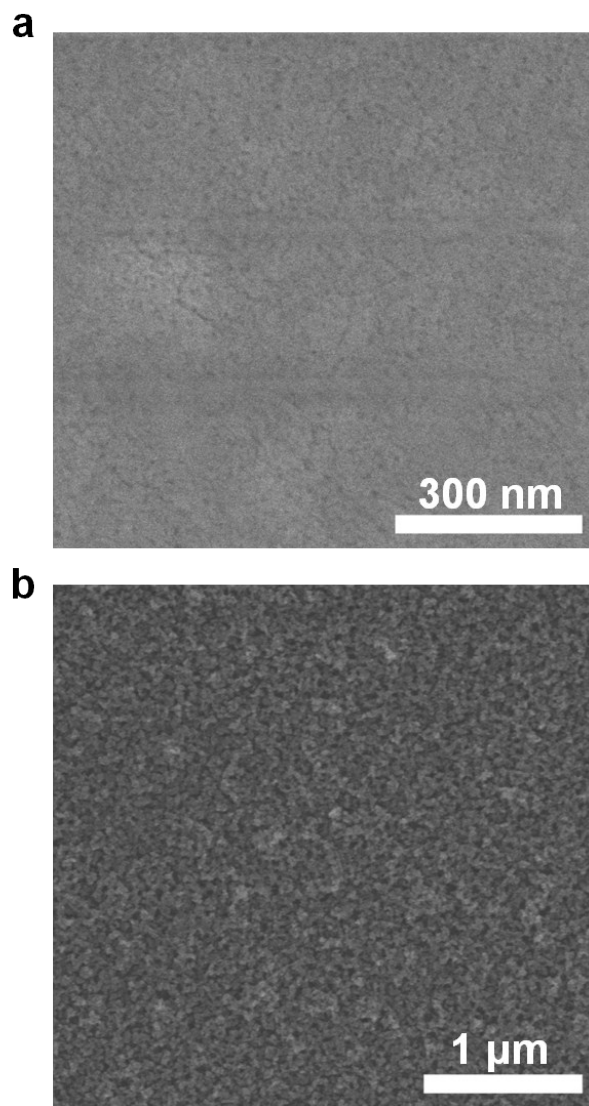

**Fig. S1** SEM images of the surface morphologic features of (a) c-TiO<sub>2</sub> layer and (b) m-TiO<sub>2</sub> layer.

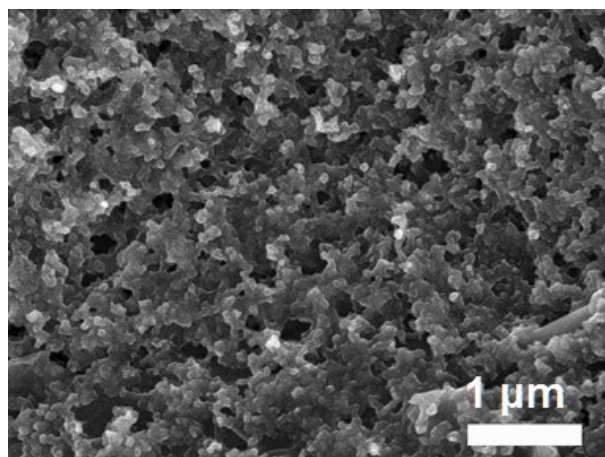

**Fig. S2** SEM image of the nanocarbon electrode in IPSC.

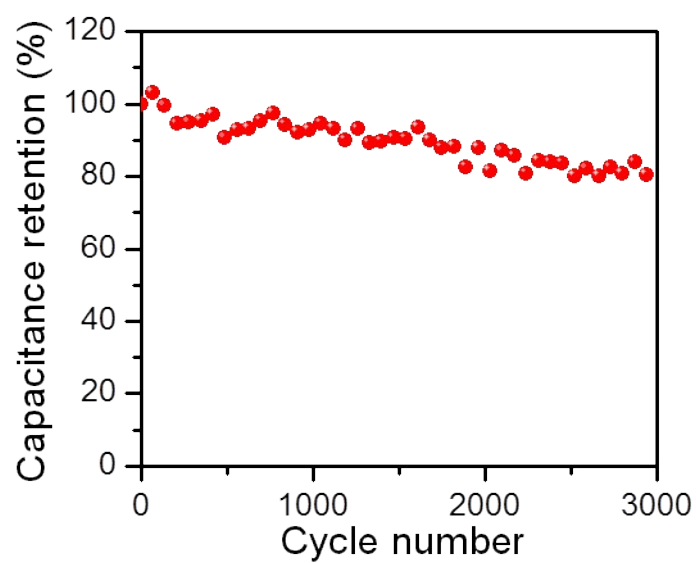

**Fig. S3** Long-term cycling stability of the supercapacitor unit in IPSC upon galvanostatic-charging/galvanostatic-discharging mode at a current density of 0.4 mA/cm<sup>2</sup>.

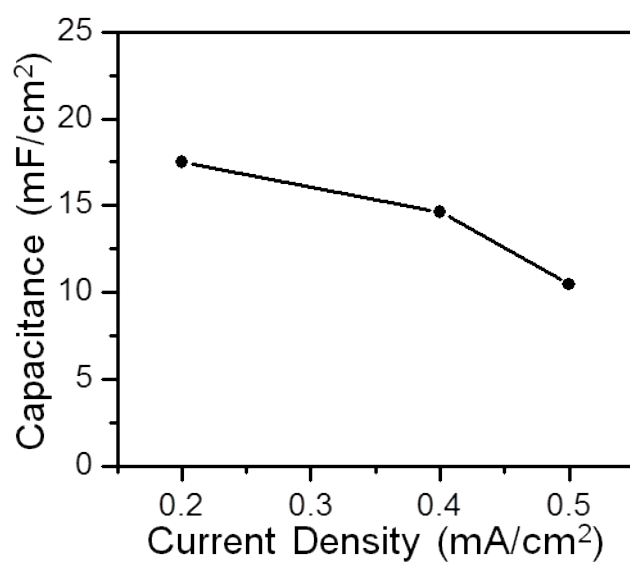

**Fig. S4** Photo-charging capacitances of the IPSC at different discharging current densities (0.2, 0.4 and 0.5 mA/cm<sup>2</sup>, respectively).

---

**Table S2.** Photovoltaic parameters of the PSC unit in IPSC under AM1.5G simulated solar illumination with different light intensities (45–100 mW/cm<sup>2</sup>).

| Light intensity<br>(mW/cm <sup>2</sup> ) | $J_{SC}$ (mA/cm <sup>2</sup> ) | $V_{OC}$ (V) | $FF$ | PCE (%) |
|------------------------------------------|--------------------------------|--------------|------|---------|
| 100                                      | 20.0                           | 0.92         | 0.48 | 8.9     |
| 85                                       | 18.0                           | 0.90         | 0.48 | 9.1     |
| 75                                       | 15.7                           | 0.90         | 0.49 | 9.2     |
| 65                                       | 13.6                           | 0.89         | 0.50 | 9.2     |
| 55                                       | 11.4                           | 0.88         | 0.51 | 9.3     |
| 45                                       | 9.5                            | 0.87         | 0.52 | 9.6     |

**Table S3.** Performances of the supercapacitor unit of the IPSC in this work compared with other photo-charging devices in the literature.

| Reference               | Electrode materials                   | Work voltages | Rate performance                                                                                          | Cycle life            |
|-------------------------|---------------------------------------|---------------|-----------------------------------------------------------------------------------------------------------|-----------------------|
| This work               | Carbon                                | 0-1.0 V       | 15.3 mF/cm <sup>2</sup> at 0.1 mA/cm <sup>2</sup> ;<br>10.7 mF/cm <sup>2</sup> at 0.5 mA/cm <sup>2</sup>  | 85% for 3000 cycles   |
| [1] (our previous work) | CF@TiO <sub>2</sub> @MoS <sub>2</sub> | 0-0.8 V       | 18.51 mF/cm <sup>2</sup> at 0.02 mA;<br>13.51 mF/cm <sup>2</sup> at 0.1 mA                                | 81% for 3000 cycles   |
| [2]                     | Carbon nanotubes                      | 0-0.8 V       | 21.7 F/g at 0.05 A/g;<br>18.6 F/g at 0.6 A/g                                                              | --                    |
| [3]                     | Carbon nanotubes                      | 0-0.7 V       | 4.11 mF/cm <sup>2</sup> at 2×10 <sup>-7</sup> A;<br>3.32 mF/cm <sup>2</sup> at 1×10 <sup>-5</sup> A       | 100% for 8000 cycles  |
| [38]                    | TiO <sub>2</sub>                      | 0-0.63 V      | 1.072 mF/cm <sup>2</sup> at 0.1 mA/cm <sup>2</sup> ;<br>0.8 mF/cm <sup>2</sup> at 2 mA/cm <sup>2</sup>    | 98.8% for 3000 cycles |
| [39]                    | PANI                                  | 0-0.6 V       | 19.2 mF/cm <sup>2</sup> at 0.32 mA/cm <sup>2</sup> ;<br>19 mF/cm <sup>2</sup> at 12.8 mA/cm <sup>2</sup>  | 100% for 10000 cycles |
| [40]                    | Silicon                               | 0-0.64 V      | 3.5 mF/cm <sup>2</sup> at 0.05 mA/cm <sup>2</sup>                                                         | 105% for 3000 cycles  |
| [43]                    | TiO <sub>2</sub>                      | 0-0.8 V       | 572 mF/cm <sup>2</sup> at 1 mA/cm <sup>2</sup> ;<br>486.2 mF/cm <sup>2</sup> at 15 mA/cm <sup>2</sup>     | --                    |
| [46]                    | PEDOT-carbon                          | 0-0.7 V       | 12.8 mF/cm <sup>2</sup> at 0.25 mA/cm <sup>2</sup> ;<br>10.8 mF/cm <sup>2</sup> at 1.5 mA/cm <sup>2</sup> | 95% for 2000 cycles   |
| [49]                    | Carbon nanotube fiber                 | 0-0.8 V       | 0.6 mF/cm <sup>2</sup> at 0.25 μA;                                                                        | --                    |
| [50]                    | Carbon nanotubes                      | 0-0.6 V       | 0.077 mF/cm at 0.1 μA                                                                                     | --                    |
